# Supplementary material for: Childhood Health and Educational outcomes afteR perinatal Brain injury (CHERuB): protocol for a population-matched cohort study
Source: PubMed Central journal article supplement (PMC11337658; doi:10.1136/bmjopen-2024-089510), 2024-08-19
Supplement: bmjopen-14-8-s001.pdf [file bmjopen-14-8-s001.pdf]

**Extensions to the Department of Health and Social Care definition:**

Any of the following recorded in any *Diagnosis* field:

- Grade 1 Hypoxic Ischaemic Encephalopathy (HIE)
- Mild Neonatal Encephalopathy
- Mild Hypoxic Ischaemic Encephalopathy HIE)

Any of the following recorded in any *Diagnosis* field:

1. Intraventricular haemorrhage (IVH Grade 1)
2. Intraventricular haemorrhage (IVH Grade 2)

Any of the following recorded in any *cranial ultrasound findings* field:

1. IVH Grade 1
2. IVH Grade 2

**Department of Health and Social Care definition of brain injury:**

**HIE**

Any of the following recorded in any *Diagnosis* field:

1. Severe Hypoxic Ischaemic Encephalopathy (HIE)
2. Severe Neonatal Encephalopathy
3. Grade 3 Hypoxic Ischaemic Encephalopathy (HIE)
4. Moderate Hypoxic Ischaemic Encephalopathy (HIE)
5. Moderate Neonatal Encephalopathy
6. Grade 2 Hypoxic Ischaemic Encephalopathy (HIE)

**OR**

The following recorded in *daily care neurology* field:

Therapeutic hypothermia induced - for 2 or more consecutive days

**Seizures**

Any of the following recorded in any *daily care neurology* field:

1. Seizure occurred

**Intracranial haemorrhage**

Any of the following recorded in any *Diagnosis* field:

3. Subdural haemorrhage due to birth injury
4. Cerebral haemorrhage due to birth injury
5. Traumatic intraventricular haemorrhage
6. Subarachnoid haemorrhage due to birth injury
7. Subarachnoid haemorrhage
8. Tentorial tear due to birth injury
9. Intracranial laceration and haemorrhage due to birth injury
10. Large intraventricular haemorrhage (IVH Grade 3)
11. Intraventricular haemorrhage/parenchymal
12. Parenchymal haemorrhage
13. Intraventricular haemorrhage (IVH Grade 4)
14. Intracranial Haemorrhage (unknown or unspecified cause)
15. Intracerebral haemorrhage
16. Intracerebral haemorrhage (term infant)
17. Intraventricular haemorrhage (perinatal)
18. Post-haemorrhagic hydrocephalus

**OR**

Any of the following recorded in any *cranial ultrasound findings* field:

3. Large intraventricular haemorrhage (IVH Grade 3)
4. Intraventricular haemorrhage/parenchymal haemorrhage (IVH Grade 4)
5. Parenchymal haemorrhage

**OR**

Any of the following recorded in any *procedure field*:

1. Ventriculoperitoneal or other ventricular shunt
  2. External ventricular drain
  3. Ventricular drain with reservoir
  4. Insertion of ventricular peritoneal shunt.
  5. Insertion of Rickham reservoir
  6. Insertion of ventriculo-atrial CSF shunt
  7. Insertion of ventriculo-peritoneal CSF shunt
- Creation of ventriculoperitoneal shunt

#### **Preterm white matter injury**

Any of the following recorded in any *Diagnosis* field:

1. Cystic periventricular leukomalacia

**OR**

Any of the following recorded in any *cranial ultrasound findings* field:

Cystic periventricular leukomalacia

#### **Perinatal stroke**

Any of the following recorded in any *Diagnosis at discharge* field:

1. Neonatal stroke
2. Infarction: Middle cerebral artery (stroke)
3. Cerebrovascular accident (stroke)
4. Cerebral venous thrombosis

Neonatal cerebral ischaemia

#### **Central Nervous System Infection**

Any of the following diagnosis codes recorded in the *diagnosis* field:

1. Bacterial meningitis
2. Viral meningitis
3. Meningitis – streptococcal
4. Meningitis – bacterial (specific organism)
5. Meningitis – bacterial (unknown or unspecified organism)
6. Meningitis – Candida
7. Candida encephalitis
8. Congenital herpes infection

Any pathogen recorded in the *suspected infection data* field *Pathogen in CSF*

#### **Kernicterus**

Any of the following diagnoses recorded in any *Diagnosis* field:

1. Bilirubin encephalopathy (immune)
2. Kernicterus (unspecified or unknown cause)
