# Supplementary material for: Childhood Health and Educational outcomes afteR perinatal Brain injury (CHERuB): protocol for a population-matched cohort study
Source: PubMed Central journal article supplement (PMC11337658; doi:10.1136/bmjopen-2024-089510), 2024-08-19
Supplement: bmjopen-14-8-s002.pdf [file bmjopen-14-8-s002.pdf]

| Supplement 2: The CHERuB study definition of survival without neurosensory impairment |                                                |                                                                                                                                                                                                                                                                                                                                                                                                                                                                                              |
|---------------------------------------------------------------------------------------|------------------------------------------------|----------------------------------------------------------------------------------------------------------------------------------------------------------------------------------------------------------------------------------------------------------------------------------------------------------------------------------------------------------------------------------------------------------------------------------------------------------------------------------------------|
| Data source                                                                           | Domains/ conditions                            | Definition                                                                                                                                                                                                                                                                                                                                                                                                                                                                                   |
| NNRD                                                                                  | Developmental delay                            | <input type="checkbox"/> Mild developmental delay (3-6 months)<br><input type="checkbox"/> Moderate developmental delay (6-12 months)<br><input type="checkbox"/> Severe developmental delay (>12 months)                                                                                                                                                                                                                                                                                    |
|                                                                                       | Communication                                  | <input type="checkbox"/> Any difficulty with communication<br><input type="checkbox"/> Difficulty with speech (<10 words or signs)<br><input type="checkbox"/> Difficulty understanding outside of familiar context<br><input type="checkbox"/> Has <5 meaningful words, vocalisations, or signs<br><input type="checkbox"/> Unable to understand words or signs                                                                                                                             |
|                                                                                       | Motor                                          | <input type="checkbox"/> Any difficulty walking<br><input type="checkbox"/> Unable to walk without assistance<br><input type="checkbox"/> Non-fluent or abnormal gait reducing mobility<br><input type="checkbox"/> Difficulty with the use of both hands<br><input type="checkbox"/> Difficulty with the use of one hand<br><input type="checkbox"/> Unable or needs support sitting<br><input type="checkbox"/> Unable to sit<br><input type="checkbox"/> Unable to use hands e.g. to feed |
|                                                                                       | Vision                                         | <input type="checkbox"/> Any vision problems including squint<br><input type="checkbox"/> A not fully correctable visual defect<br><input type="checkbox"/> Complete blindness or able to see light only                                                                                                                                                                                                                                                                                     |
|                                                                                       | Auditory                                       | <input type="checkbox"/> A hearing impairment<br><input type="checkbox"/> Hearing impairment correctable with aids<br><input type="checkbox"/> Hearing impairment not correctable with aids                                                                                                                                                                                                                                                                                                  |
| HES and ONS Mortality Records                                                         | Survival                                       | <input type="checkbox"/> The absence of a death record in a linked HES record                                                                                                                                                                                                                                                                                                                                                                                                                |
|                                                                                       | Cognitive impairment                           | F70-79 Intellectual impairment<br>F81.0 Specific reading disorder<br>F81.1 Specific spelling disorder<br>F81.2 Specific disorder of arithmetical skills<br>F81.3 Mixed disorder of scholastic skills<br>F81.8 Other developmental disorders of scholastic skills<br>F81.9 Developmental disorder of scholastic skills, unspecified<br>R48.0 Dyslexia and alexia<br>R 48.1 Agnosia<br>R48.2 Apraxia<br><br>R48.8 Other and unspecified symbolic dysfunctions                                  |
|                                                                                       | Developmental disorders of speech and language | F80.0 Specific speech articulation disorder<br>F80.1 Expressive language disorder<br>F80.2 Receptive language disorder<br>F80.3 Acquired aphasia with epilepsy [Landau-Kleffner]                                                                                                                                                                                                                                                                                                             |

|  |                                                                                    |                                                                                                                                                                                                                                                                                                                                                                                                                                                                                                                                                                                                                                                                                                                                                                                                                                                                                                                                                                                                  |
|--|------------------------------------------------------------------------------------|--------------------------------------------------------------------------------------------------------------------------------------------------------------------------------------------------------------------------------------------------------------------------------------------------------------------------------------------------------------------------------------------------------------------------------------------------------------------------------------------------------------------------------------------------------------------------------------------------------------------------------------------------------------------------------------------------------------------------------------------------------------------------------------------------------------------------------------------------------------------------------------------------------------------------------------------------------------------------------------------------|
|  |                                                                                    | <p>F80.9 Developmental disorder of speech and language, unspecified<br/> R47.0 Dysphasia and aphasia<br/> R47.1 Dysarthria and anarthria<br/> R47.8 Other and unspecified speech disturbances</p>                                                                                                                                                                                                                                                                                                                                                                                                                                                                                                                                                                                                                                                                                                                                                                                                |
|  | <p>Specific developmental disorder of motor function/ dystonia/ cerebral palsy</p> | <p>F82 Specific developmental disorder of motor function<br/> G24.9 Dystonia, unspecified<br/> G80 Cerebral palsy<br/> G81 Hemiplegia<br/> G82 Paraplegia and tetraplegia<br/> G83.0 Diplegia of upper limbs<br/> G83.1 Monoplegia of lower limb<br/> G83.2 Monoplegia of upper limb<br/> G83.4 Cauda equina syndrome<br/> G83.5 Locked in syndrome<br/> G83.6 Upper motor neuron facial paralysis<br/> R26.0 Ataxic gait<br/> R26.1 Paralytic gait<br/> R27.0 Ataxia unspecified<br/> R27.8 Other and unspecified lack of coordination<br/> G25.9 Extrapyrmidal and movement disorder, unspecified</p>                                                                                                                                                                                                                                                                                                                                                                                          |
|  | <p>Vision</p>                                                                      | <p>H47.6 Disorders of visual cortex<br/> H51.0 Palsy of conjugate gaze<br/> H51.1 Convergence insufficiency and excess<br/> H51.2 Internuclear ophthalmoplegia<br/> H51.8 Other specified disorders of binocular movement<br/> H51.9 Disorder of binocular movement, unspecified<br/> H52.0 Hypermetropia<br/> H52.1 Myopia<br/> H52.2 Astigmatism<br/> H52.3 Anisometropia and aniseikonia<br/> H52.4 Presbyopia<br/> H52.5 Disorders of accommodation<br/> H52.6 Other disorders of refraction<br/> H52.7 Disorder of refraction, unspecified<br/> H 53.0 Amblyopia ex anopsia<br/> H53.4 Visual field defects<br/> H55 Nystagmus and other irregular eye movements</p> <p>H54.0 Blindness, binocular<br/> H54.1 Severe visual impairment, binocular<br/> H54.2 Moderate visual impairment, binocular<br/> H54.4 Blindness, monocular<br/> H54.5 Severe visual impairment, monocular<br/> H54.6 Moderate visual impairment, monocular<br/> H54.9 Unspecified visual impairment (binocular)</p> |

|                         |                           |                                                                                                                                                                                                                                                                                                                                                                                                                                                                                                                                                                                                                                                                                                                                                                                                                                                                                                                                                                                                                                                                                                                                                                                                                         |
|-------------------------|---------------------------|-------------------------------------------------------------------------------------------------------------------------------------------------------------------------------------------------------------------------------------------------------------------------------------------------------------------------------------------------------------------------------------------------------------------------------------------------------------------------------------------------------------------------------------------------------------------------------------------------------------------------------------------------------------------------------------------------------------------------------------------------------------------------------------------------------------------------------------------------------------------------------------------------------------------------------------------------------------------------------------------------------------------------------------------------------------------------------------------------------------------------------------------------------------------------------------------------------------------------|
|                         | Hearing                   | <p>H90.3 Sensorineural hearing loss, bilateral<br/> H90.4 Sensorineural hearing loss, unilateral with unrestricted hearing on the contralateral side<br/> H90.5 Sensorineural hearing loss, unspecified<br/> H90.6 Mixed conductive and sensorineural hearing loss, bilateral<br/> H90.7 Mixed conductive and sensorineural hearing loss, unilateral with unrestricted hearing on the contralateral side<br/> H90.8 Mixed conductive and sensorineural hearing loss, unspecified</p> <p>D24 Operations on cochlea<br/> D24.1 Implantation of intracochlear prosthesis<br/> D24.2 Implantation of extracochlear prosthesis<br/> D24.3 Attention to cochlear prosthesis<br/> D24.4 Neurectomy of cochlea<br/> D24.6 Removal of cochlear prosthesis<br/> D24.8 Other specified operations on cochlea<br/> D24.9 Unspecified operations on cochlea<br/> D13 Attachment of Bone Anchored Hearing Prosthesis<br/> D16 Reconstruction of Ossicular Chain<br/> D05 Attachment of auricular prosthesis<br/> Z453 Adjustment and management of implanted hearing device<br/> Z461 Fitting and adjustment of hearing aid<br/> Z962 Presence of otological and audiological implants<br/> Z974 Presence of external hearing-aid</p> |
| National Pupil Database | Academic attainment       | <p>Did not achieve expected level or the presence of a SEN that precluded assessment at:<br/> Early Years Foundation Stage<br/> Key Stage 1 national assessment<br/> Key Stage 2 national assessment</p>                                                                                                                                                                                                                                                                                                                                                                                                                                                                                                                                                                                                                                                                                                                                                                                                                                                                                                                                                                                                                |
|                         | Special educational needs | <p>Indication of type of need for SEN provision (primary or secondary) irrespective of level of SEN provision (SEN support or EHCP)</p> <ul style="list-style-type: none"> <li><input type="checkbox"/> Specific Learning Difficulty</li> <li><input type="checkbox"/> Moderate Learning Difficulty</li> <li><input type="checkbox"/> Severe Learning Difficulty</li> <li><input type="checkbox"/> Profound &amp; Multiple Learning Difficulty</li> <li><input type="checkbox"/> Speech, Language and Communication Needs</li> <li><input type="checkbox"/> Hearing Impairment</li> <li><input type="checkbox"/> Visual Impairment</li> <li><input type="checkbox"/> Multi-Sensory Impairment</li> <li><input type="checkbox"/> Physical Disability</li> </ul>                                                                                                                                                                                                                                                                                                                                                                                                                                                          |
