# Supplementary material for: Childhood Health and Educational outcomes afteR perinatal Brain injury (CHERuB): protocol for a population-matched cohort study
Source: PubMed Central journal article supplement (PMC11337658; doi:10.1136/bmjopen-2024-089510), 2024-08-19
Supplement: bmjopen-14-8-s003.pdf [file bmjopen-14-8-s003.pdf]

| Supplement 3: The CHERuB study definition of any and individual neurodevelopmental impairment<br>*Denotes inclusion in the primary outcome of survival without neurosensory impairment |                                                 |                                                                                                                                                                                                                                                                                                                                                                                                                                                                                              |
|----------------------------------------------------------------------------------------------------------------------------------------------------------------------------------------|-------------------------------------------------|----------------------------------------------------------------------------------------------------------------------------------------------------------------------------------------------------------------------------------------------------------------------------------------------------------------------------------------------------------------------------------------------------------------------------------------------------------------------------------------------|
| Data source                                                                                                                                                                            | Domains/ conditions                             | Definition                                                                                                                                                                                                                                                                                                                                                                                                                                                                                   |
| NNRD                                                                                                                                                                                   | Developmental delay*                            | <input type="checkbox"/> Mild developmental delay (3-6 months)<br><input type="checkbox"/> Moderate developmental delay (6-12 months)<br><input type="checkbox"/> Severe developmental delay (>12 months)                                                                                                                                                                                                                                                                                    |
|                                                                                                                                                                                        | Communication*                                  | <input type="checkbox"/> Any difficulty with communication<br><input type="checkbox"/> Difficulty with speech (<10 words or signs)<br><input type="checkbox"/> Difficulty understanding outside of familiar context<br><input type="checkbox"/> Has <5 meaningful words, vocalisations, or signs<br><input type="checkbox"/> Unable to understand words or signs                                                                                                                             |
|                                                                                                                                                                                        | Motor*                                          | <input type="checkbox"/> Any difficulty walking<br><input type="checkbox"/> Unable to walk without assistance<br><input type="checkbox"/> Non-fluent or abnormal gait reducing mobility<br><input type="checkbox"/> Difficulty with the use of both hands<br><input type="checkbox"/> Difficulty with the use of one hand<br><input type="checkbox"/> Unable or needs support sitting<br><input type="checkbox"/> Unable to sit<br><input type="checkbox"/> Unable to use hands e.g. to feed |
|                                                                                                                                                                                        | Vision*                                         | <input type="checkbox"/> Any vision problems including squint<br><input type="checkbox"/> A not fully correctable visual defect<br><input type="checkbox"/> Complete blindness or able to see light only                                                                                                                                                                                                                                                                                     |
|                                                                                                                                                                                        | Auditory*                                       | <input type="checkbox"/> A hearing impairment<br><input type="checkbox"/> Hearing impairment correctable with aids<br><input type="checkbox"/> Hearing impairment not correctable with aids                                                                                                                                                                                                                                                                                                  |
| HES and ONS<br>Mortality Records                                                                                                                                                       | Cognitive impairment*                           | F70-79 Intellectual impairment<br>F81.0 Specific reading disorder<br>F81.1 Specific spelling disorder<br>F81.2 Specific disorder of arithmetical skills<br>F81.3 Mixed disorder of scholastic skills<br>F81.8 Other developmental disorders of scholastic skills<br>F81.9 Developmental disorder of scholastic skills, unspecified<br>R48.0 Dyslexia and alexia<br>R 48.1 Agnosia<br>R48.2 Apraxia<br><br>R48.8 Other and unspecified symbolic dysfunctions                                  |
|                                                                                                                                                                                        | Developmental disorders of speech and language* | F80.0 Specific speech articulation disorder<br>F80.1 Expressive language disorder<br>F80.2 Receptive language disorder<br>F80.3 Acquired aphasia with epilepsy [Landau-Kleffner]                                                                                                                                                                                                                                                                                                             |

|                                                                              |                                                                                                                                                                                                                                                                                                                                                                                                                                                                                                                                                                      |
|------------------------------------------------------------------------------|----------------------------------------------------------------------------------------------------------------------------------------------------------------------------------------------------------------------------------------------------------------------------------------------------------------------------------------------------------------------------------------------------------------------------------------------------------------------------------------------------------------------------------------------------------------------|
|                                                                              | F80.9 Developmental disorder of speech and language, unspecified<br>R47.0 Dysphasia and aphasia<br>R47.1 Dysarthria and anarthria<br>R47.8 Other and unspecified speech disturbances                                                                                                                                                                                                                                                                                                                                                                                 |
| Specific developmental disorder of motor function/ dystonia/ cerebral palsy* | F82 Specific developmental disorder of motor function<br>G24.9 Dystonia, unspecified<br>G80 Cerebral palsy<br>G81 Hemiplegia<br>G82 Paraplegia and tetraplegia<br>G83.0 Diplegia of upper limbs<br>G83.1 Monoplegia of lower limb<br>G83.2 Monoplegia of upper limb<br>G83.4 Cauda equina syndrome<br>G83.5 Locked in syndrome<br>G83.6 Upper motor neuron facial paralysis<br>R26.0 Ataxic gait<br>R26.1 Paralytic gait<br>R27.0 Ataxia unspecified<br>R27.8 Other and unspecified lack of coordination<br>G 25.9 Extrapyramidal and movement disorder, unspecified |
| Mixed developmental disorders                                                | F83 Mixed specific developmental disorders                                                                                                                                                                                                                                                                                                                                                                                                                                                                                                                           |
| Developmental delay                                                          | R62.0 Delayed milestone*                                                                                                                                                                                                                                                                                                                                                                                                                                                                                                                                             |
| Pervasive developmental disorders                                            | F84.0 Childhood autism<br>F84.1 Atypical autism<br>F84.4 Overactive disorder associated with mental retardation and stereotyped movements<br>F84.5 Asperger syndrome<br>F84.8 Other pervasive developmental disorders<br>F84.9 Pervasive developmental disorder, unspecified                                                                                                                                                                                                                                                                                         |
| Other disorders of psychological development                                 | F88 Other disorders of psychological development<br>F89 Unspecified disorder of psychological development                                                                                                                                                                                                                                                                                                                                                                                                                                                            |
| Hyperkinetic disorders                                                       | F 90.0 Disturbance of activity and attention<br>F90.1 Hyperkinetic conduct disorder<br>F90.8 Other hyperkinetic disorders<br>F90.9 Hyperkinetic disorder, unspecified                                                                                                                                                                                                                                                                                                                                                                                                |
| Tic disorders                                                                | F95.0 Transient tic disorder<br>F95.1 Chronic motor or vocal tic disorder<br>F95.8 Other tic disorders<br>F95.9 Tic disorder, unspecified<br>F98.4 Stereotyped movement disorders                                                                                                                                                                                                                                                                                                                                                                                    |
| Epilepsy                                                                     | G40.0 Localization-related (focal)(partial) idiopathic epilepsy and epileptic syndromes with seizures of localized onset<br>G40.1 Localization-related (focal)(partial) symptomatic epilepsy and epileptic syndromes with simple partial seizures                                                                                                                                                                                                                                                                                                                    |

|          |                                                                                                                                                                                                                                                                                                                                                                                                                                                                                                                                                                                                                                                                                                                                                                                                                                                                                                                                                                                                                                         |
|----------|-----------------------------------------------------------------------------------------------------------------------------------------------------------------------------------------------------------------------------------------------------------------------------------------------------------------------------------------------------------------------------------------------------------------------------------------------------------------------------------------------------------------------------------------------------------------------------------------------------------------------------------------------------------------------------------------------------------------------------------------------------------------------------------------------------------------------------------------------------------------------------------------------------------------------------------------------------------------------------------------------------------------------------------------|
|          | <p>G40.2 Localization-related (focal)(partial) symptomatic epilepsy and epileptic syndromes with complex partial seizures</p> <p>G40.3 Generalized idiopathic epilepsy and epileptic syndromes</p> <p>G40.4 Other generalized epilepsy and epileptic syndromes</p> <p>G40.6 Grand mal seizures, unspecified (with or without petit mal)</p> <p>G40.7 Petit mal, unspecified, without grand mal seizures</p> <p>G40.8 Other epilepsy</p> <p>G40.9 Epilepsy, unspecified</p> <p>G41 Status epilepticus</p>                                                                                                                                                                                                                                                                                                                                                                                                                                                                                                                                |
| Vision*  | <p>H47.6 Disorders of visual cortex</p> <p>H51.0 Palsy of conjugate gaze</p> <p>H51.1 Convergence insufficiency and excess</p> <p>H51.2 Internuclear ophthalmoplegia</p> <p>H51.8 Other specified disorders of binocular movement</p> <p>H51.9 Disorder of binocular movement, unspecified</p> <p>H52.0 Hypermetropia</p> <p>H52.1 Myopia</p> <p>H52.2 Astigmatism</p> <p>H52.3 Anisometropia and aniseikonia</p> <p>H52.4 Presbyopia</p> <p>H52.5 Disorders of accommodation</p> <p>H52.6 Other disorders of refraction</p> <p>H52.7 Disorder of refraction, unspecified</p> <p>H 53.0 Amblyopia ex anopsia</p> <p>H53.4 Visual field defects</p> <p>H55 Nystagmus and other irregular eye movements</p><br><p>H54.0 Blindness, binocular</p> <p>H54.1 Severe visual impairment, binocular</p> <p>H54.2 Moderate visual impairment, binocular</p> <p>H54.4 Blindness, monocularH54.5 Severe visual impairment, monocular</p> <p>H54.6 Moderate visual impairment, monocular</p> <p>H54.9 Unspecified visual impairment (binocular)</p> |
| Hearing* | <p>H90.3 Sensorineural hearing loss, bilateral</p> <p>H90.4 Sensorineural hearing loss, unilateral with unrestricted hearing on the contralateral side</p> <p>H90.5 Sensorineural hearing loss, unspecified</p> <p>H90.6 Mixed conductive and sensorineural hearing loss, bilateral</p> <p>H90.7 Mixed conductive and sensorineural hearing loss, unilateral with unrestricted hearing on the contralateral side</p> <p>H90.8 Mixed conductive and sensorineural hearing loss, unspecified</p>                                                                                                                                                                                                                                                                                                                                                                                                                                                                                                                                          |

|                         |                           |                                                                                                                                                                                                                                                                                                                                                                                                                                                                                                                                                                                                                                                                                                                                                                                                                                                                                                                                                                                                                                                                                                                                                                        |
|-------------------------|---------------------------|------------------------------------------------------------------------------------------------------------------------------------------------------------------------------------------------------------------------------------------------------------------------------------------------------------------------------------------------------------------------------------------------------------------------------------------------------------------------------------------------------------------------------------------------------------------------------------------------------------------------------------------------------------------------------------------------------------------------------------------------------------------------------------------------------------------------------------------------------------------------------------------------------------------------------------------------------------------------------------------------------------------------------------------------------------------------------------------------------------------------------------------------------------------------|
|                         |                           | <p>D24 Operations on cochlea</p> <p>D24.1 Implantation of intracochlear prosthesis</p> <p>D24.2 Implantation of extracochlear prosthesis</p> <p>D24.3 Attention to cochlear prosthesis</p> <p>D24.4 Neurectomy of cochlea</p> <p>D24.6 Removal of cochlear prosthesis</p> <p>D24.8 Other specified operations on cochlea</p> <p>D24.9 Unspecified operations on cochlea</p> <p>D13 Attachment of Bone Anchored Hearing Prosthesis</p> <p>D16 Reconstruction of Ossicular Chain</p> <p>D05 Attachment of auricular prosthesis</p> <p>Z453 Adjustment and management of implanted hearing device</p> <p>Z461 Fitting and adjustment of hearing aid</p> <p>Z962 Presence of otological and audiological implants</p> <p>Z974 Presence of external hearing-aid</p>                                                                                                                                                                                                                                                                                                                                                                                                         |
| National Pupil Database | Academic attainment       | <p>Did not achieve expected level or the presence of a SEN that precluded assessment at:</p> <p>Early Years Foundation Stage*</p> <p>Phonics assessment</p> <p>Key Stage 1 national assessment*</p> <p>Key Stage 2 national assessment*</p>                                                                                                                                                                                                                                                                                                                                                                                                                                                                                                                                                                                                                                                                                                                                                                                                                                                                                                                            |
|                         | Special educational needs | <p>Presence of EHCP or statement of SEN</p> <p>Attends specialist school</p> <p>Indication of type of need for SEN provision (primary or secondary) irrespective of level of SEN provision (SEN support or EHCP)</p> <ul style="list-style-type: none"> <li><input type="checkbox"/> Specific Learning Difficulty*</li> <li><input type="checkbox"/> Moderate Learning Difficulty*</li> <li><input type="checkbox"/> Severe Learning Difficulty*</li> <li><input type="checkbox"/> Profound &amp; Multiple Learning Difficulty*</li> <li><input type="checkbox"/> Behaviour, Emotional &amp; Social Difficulties (up to 2013/14)</li> <li><input type="checkbox"/> Social, emotional, and mental health (from 2014/15)</li> <li><input type="checkbox"/> Speech, Language and Communication Needs*</li> <li><input type="checkbox"/> Hearing Impairment*</li> <li><input type="checkbox"/> Visual Impairment*</li> <li><input type="checkbox"/> Multi-Sensory Impairment*</li> <li><input type="checkbox"/> Physical Disability*</li> <li><input type="checkbox"/> Autistic Spectrum Disorder</li> <li><input type="checkbox"/> Other Difficulty/Disability</li> </ul> |
