# Supplementary material for: Childhood Health and Educational outcomes afteR perinatal Brain injury (CHERuB): protocol for a population-matched cohort study
Source: PubMed Central journal article supplement (PMC11337658; doi:10.1136/bmjopen-2024-089510), 2024-08-19
Supplement: bmjopen-14-8-s004.pdf [file bmjopen-14-8-s004.pdf]

Supplement 4: The CHERuB study definition of mental health and behavioural conditions

|     |                                     |                                                                                                                                                                                                                                                                                                                                                                                                                       |
|-----|-------------------------------------|-----------------------------------------------------------------------------------------------------------------------------------------------------------------------------------------------------------------------------------------------------------------------------------------------------------------------------------------------------------------------------------------------------------------------|
| HES | Behavioural and emotional disorders | <p>F90 Hyperkinetic disorders</p> <p>F91 Conduct disorders</p> <p>F92 Mixed disorders of conduct and emotions</p> <p>F93 Emotional disorders with onset specific to childhood</p> <p>F94 Disorders of social functioning with onset specific to childhood and adolescence</p> <p>F95 Tic disorders</p> <p>F98 Other behavioural and emotional disorders with onset usually occurring in childhood and adolescence</p> |
|     | Pervasive disorders (Autisms)       | <p>F84.0 Childhood autism</p> <p>F84.1 Atypical autism</p> <p>F 84.3 Other childhood disintegrative disorder</p> <p>F84.4 Overactive disorder associated with mental retardation and stereotyped movements</p> <p>F84.5 Asperger syndrome</p> <p>F84.8 Other pervasive developmental disorders</p> <p>F84.9 Pervasive developmental disorder, unspecified</p>                                                         |
|     | Mood disorders                      | <p>F30 Manic episode</p> <p>F31 Bipolar affective disorder</p> <p>F32 Depressive episode</p> <p>F33 Recurrent depressive disorder</p> <p>F34 Persistent mood [affective] disorders</p> <p>F38 Other mood [affective] disorders</p>                                                                                                                                                                                    |

|     |                                                                                                                             |                                                                                                                                                                                                                                                                                                   |
|-----|-----------------------------------------------------------------------------------------------------------------------------|---------------------------------------------------------------------------------------------------------------------------------------------------------------------------------------------------------------------------------------------------------------------------------------------------|
|     |                                                                                                                             | F39 Unspecified mood [affective] disorder                                                                                                                                                                                                                                                         |
|     | Anxiety disorders                                                                                                           | <p>F40 Phobic anxiety disorders</p> <p>F41 Other anxiety disorders</p> <p>F42 Obsessive-compulsive disorder</p> <p>F43 Reaction to severe stress, and adjustment disorders</p> <p>F44 Dissociative [conversion] disorders</p> <p>F45 Somatoform disorders</p> <p>F48 Other neurotic disorders</p> |
| NPD | Indication of type of need for special educational need provision (primary or secondary) irrespective of level of provision | Behaviour, emotional & social difficulties (up to 2013/14)                                                                                                                                                                                                                                        |
|     |                                                                                                                             | Social, emotional, and mental health (from 2014/15)                                                                                                                                                                                                                                               |
|     |                                                                                                                             | Autistic spectrum disorder                                                                                                                                                                                                                                                                        |
