# Supplementary material for: Childhood Health and Educational outcomes afteR perinatal Brain injury (CHERuB): protocol for a population-matched cohort study
Source: PubMed Central journal article supplement (PMC11337658; doi:10.1136/bmjopen-2024-089510), 2024-08-19
Supplement: bmjopen-2024-089510.reviewer_comments.pdf [file bmjopen-2024-089510.reviewer_comments.pdf]

## PEER REVIEW HISTORY

BMJ Open publishes all reviews undertaken for accepted manuscripts. Reviewers are asked to complete a checklist review form (<http://bmjopen.bmj.com/site/about/resources/checklist.pdf>) and are provided with free text boxes to elaborate on their assessment. These free text comments are reproduced below.

## ARTICLE DETAILS

|                            |                                                                                                                                             |
|----------------------------|---------------------------------------------------------------------------------------------------------------------------------------------|
| <b>TITLE (PROVISIONAL)</b> | Childhood Health and Educational outcomes after perinatal Brain injury (CHERuB): protocol for a population matched cohort study             |
| <b>AUTHORS</b>             | Rees, Philippa; Gale, Chris; Battersby, Cheryl; Williams, Carrie; Purkayastha, Mitana; Zylbersztejn, Ania; Carter, Ben; Sutcliffe, Alastair |

This article was not externally reviewed at BMJ Open. Protocols that have been independently assessed prior to submission to BMJ Open are usually fast-tracked to publication on the grounds that further substantial changes will not be possible. This independent assessment will usually be external, independent review for both a substantial grant award from a non-commercial or government funder and ethics approval.
